# Supplementary material for: Bayesian calibration of firn densification models
Source: Copernicus journal article supplement (doi:10.5194/tc-2019-274), 2020-01-03
Supplement: Supplementary file 1 [file tc-2019-274-supplement.pdf]

## S1 Separation between the calibration and the evaluation data

The 91 sites of the dataset span a broad range of temperature and accumulation rate conditions (Table S1 and Fig. S1). As explained in the main text, our objective is to select the evaluation data (22 cores) randomly but still making it representative of (i) all climatic conditions and (ii) the ratio of GrIS to AIS sites of the dataset. We separate the 91 observed cores in three tiers of lowest, middle and highest  $T_{av}$  and we select randomly 7 cores in each tier for the evaluation data. We repeat this random selection until 5 to 10 out of the 21 cores are from GrIS, with the remainder from AIS. Finally, our dataset includes two sites that are climatic outliers with respect to the others (DML and spencer4 in Table S1) with high  $T_{av}$  and  $\dot{b}$  values (Figure S1). We select randomly one of these for the evaluation data. Proceeding to the selection based on  $\dot{b}$  rather than  $T_{av}$  would be similar given the strong correlation between both variables.

## S2 The likelihood function, Eq. (8)

The covariance matrices  $\Sigma_{15}$  and  $\Sigma_{pc}$  that appear in Eq. (8) are diagonal matrices with the site-specific variances on the diagonal. At each site, we take 5% of the observed  $DIP15$  and 10% of the observed  $DIPpc$  as the standard deviation, and the variance value is the square of the standard deviation. We take the higher value of 10% for  $DIPpc$  because density errors propagate in firn models. Equation (3) shows that densification rates depend on the density value itself, resulting in error propagation through time. As such, if a model shows an offset compared to observations at 15 m depth, it is likely to show an even stronger offset at  $z_{pc}$ . Taking a higher variance alleviates the strength of this effect on the likelihood calculations by allowing a larger spread of model results compared to observed  $DIPpc$  values. The form of Eq. (8) corresponds to a normal likelihood function. This assumes that model  $DIP$  results are normally distributed around the observed values. To support this assumption, we conducted a preliminary verification of errors in  $DIP15$  ( $X_{15} - Y_{15}$ ) and  $DIPpc$  ( $X_{pc} - Y_{pc}$ ) computed with the three original models (HL, Ar, LZ) on the entire dataset and we compute a basic Kolmogorov-Smirnov test for all six sets of errors. The resulting p-values are all above 0.05. The distribution of these errors are thus in line with a normal distribution, and this is despite the presence of some outliers in the errors in  $DIP15$  that heavily disfavour the assumption of normality. We show the Quantiles-Quantiles plots for all six sets of errors in Figure S2. As explained in the main text, the form of Eq. (8) also assumes independence between errors in  $DIP15$  and  $DIPpc$ , which is the reason why  $DIPpc$  is calculated only from depths below 15 m. As such, observations-model discrepancies are essentially governed by parameter values of stage-1 densification for  $DIP15$  and by parameter values of stage-2 densification for  $DIPpc$ , with little interaction between both. The same preliminary verification as mentioned above allows us to evaluate the correlation between  $DIP15$  and  $DIPpc$  errors for all three original models on the entire dataset. This yields a correlation coefficient of 0.40. The three correlation coefficients computed for each of the original models individually are all below 0.3.

## S3 Convergence diagnostics

For convergence of the RWM algorithm, the chain must traverse between the peaks of the target posterior distribution multiple times. Simply examining the trace of the RWM algorithm for each parameter provides an effective way to verify this criterion. The trace is the history of accepted parameter values over the entire chain. We show this sampling history in Fig. S3. The fuzzy appearance for each parameter of each model indicates an efficient exploration of the parameter space as the samples from RWM algorithm oscillate around the posterior mode.

In addition to this, we compute the Gelman-Rubin statistic, which provides a numerical test for convergence (Gelman et al., 2013). The motivation behind this test is that if each chain (run independently) converges to the same posterior distribution, then the variances within each chain should be approximately the same. For each model (HL, Ar, LZ), we launch three different chains from different initial parameter values. For each parameter of each model, we calculate the mean within sample variance  $W$ :

$$W = \frac{s_1^2 + s_2^2 + s_3^2}{3} \quad (S1)$$

where  $s^2$  denotes the variance of an individual chain. We then calculate the between sample variance:

$$B = \frac{n}{3-1} \sum_{i=1}^3 (\bar{\theta}_i - \bar{\bar{\theta}})^2 \quad (S2)$$

where  $n$  denotes the number of iterations within each chain,  $\bar{\theta}_i$  the mean parameter value within each chain and  $\bar{\bar{\theta}}$  is the mean of  $(\bar{\theta}_1, \bar{\theta}_2, \bar{\theta}_3)$ . From there, the estimate of the variance of the posterior distribution is given by:

$$\sigma^2 = \frac{n-1}{n} W + \frac{1}{n} B \quad (S3)$$

And the Gelman-Rubin statistic is defined as:

$$R = \sqrt{\frac{\theta^2}{W}} \quad (\text{S4})$$

Large values of  $R$  indicate that estimates of  $\theta$  values between the different chains are significantly different. With more iterations, the chains progressively converge to the same stationary distributions and the estimates of  $\theta$  become similar, resulting in values of  $R$  close to 1. We reach  $R < 1.1$  for all parameters, which proves adequate convergence (Gelman et al., 2013). Two parameters of the LZ model needed a larger number of iterations to reach  $R < 1.1$ .

#### S4 Compaction anomaly calculation

For each model (HL, Ar, LZ, MAP<sub>HL</sub>, MAP<sub>Ar</sub>, MAP<sub>LZ</sub>), the calculation of compaction anomalies is the same. First, we compute at each site  $i$  the mean annual compaction rate (specific to each model) during the reference period 1960-1980,  $cmp_{ref,i}^{yr}$ . During this period, the firn column, and thus also compaction rates, are in steady-state. Secondly, we compute the total compaction over the transient 2000-2017 period,  $cmp_{tot,i}^{00-17}$ . Finally, we calculate the total compaction anomaly over 2000-2017:

$$cmp_{an,i}^{00-17} = cmp_{tot,i}^{00-17} - 17cmp_{ref,i}^{yr} \quad (\text{S5})$$

We compute the root mean squared difference of the compaction anomalies  $cmp_{an,i}^{00-17}$  at all sites between any pair of model  $j$  and  $k$ ,  $rmsd(j, k)$ . We take this as an approximate average discrepancy between models  $j$  and  $k$  in compaction anomalies over GrIS, to which corresponds a discrepancy in estimated mass of ice. We take an approximate GrIS accumulation area of  $1.5 \cdot 10^{12} \text{ m}^2$  (Noël et al., 2019). Using an ice density  $\rho_i$  of  $917 \text{ kg m}^{-3}$ , we reach the total ice-mass equivalent discrepancy  $\|m_{an}^{tot}\|(j, k)$  corresponding to their disagreement in  $cmp_{an}^{00-17}$  values.

$$\|m_{an}^{tot}\|(j, k) = 1.5 \cdot 10^{12} rmsd(j, k) \rho_i \quad (\text{S6})$$

The figures of disagreement between models given in Section 4 are the inter-model differences of  $\|m_{an}^{tot}\|$ . The model-specific values of  $cmp_{an}^{00-17}$  at the 27 GrIS sites are given in Table S2.

#### S5 Posterior correlation between parameters

The joint posterior distributions for the parameters of each model also allow us to analyse the models' internal structure, i.e. the correlation between their different parameters. The full correlation matrices are given in Fig. S4. In HL, the strongest correlation coefficients  $r$  are unsurprisingly found for the pairs of pre-exponential factor and activation energy governing densification in stage-1 ( $k_0^*$  and  $E_0$ ) and in stage-2 ( $k_1^*$  and  $E_1$ ) with  $r$  of 0.94 in both cases. Higher activation energies ( $E_0$  and  $E_1$ ) imply stronger thermal barriers to the densification process and thus slower densification, and the pre-exponential factors ( $k_0^*$  and  $k_1^*$ ) counter-balance the effect to still match observed  $DIP$  values. In the same way, the activation energies are negatively correlated with their respective accumulation rate exponent ( $a$  and  $b$ ), but more moderately ( $r$  values of approximately -0.4). The negative correlation of -0.44 between  $a$  and  $b$  themselves might be linked to the density at 15 m being the lower boundary and the upper boundary condition for the calculation of  $DIP_{15}$  and  $DIP_{pc}$  respectively. Higher values of  $a$  tend to cause lighter firn at 15 m depth. Lower  $E_0$  values compensate for this effect on  $DIP_{15}$  because the shallow firn densifies faster due to its greater sensitivity to temperature variations. The lighter 15 m depth density also affects  $DIP_{pc}$ , and lower values of  $b$  compensate for this by enhancing the densification rate, which explains the negative correlation between  $a$  and  $b$ . In Ar, the interpretation is more challenging due to the use of a same activation energy in both stages. There is a strong correlation between the activation energy  $E_g$  and both pre-exponential factors  $k_0^{Ar}$  ( $r = -0.94$ ) and  $k_1^{Ar}$  ( $r = -0.95$ ), for the same reason as in HL. As such, this induces a strong positive correlation between the latter parameters ( $r = 0.88$ ). The negative correlation between  $\alpha$  and  $k_1^{Ar}$  ( $r = -0.37$ ) is more surprising because these parameters apply to different stages, but it reveals an interesting pattern. Higher temperatures raise densification rates at warmer sites, where accumulation rates are also higher thus further amplifying this effect. Higher accumulation rates nevertheless cause light recently deposited firn to be buried rapidly, which may cause lower density firn governed by the fast stage-1 densification to extend below 15 m. To avoid underestimation of  $DIP_{pc}$  at such sites, stage-1 densification rates must remain low enough but there is no possibility for adjusting a stage-1 specific activation energy. Lower  $\alpha$  values generate this effect while only marginally affecting densification at colder low-accumulation sites. Thus, high  $k_1^{Ar}$  without a complementary lower  $\alpha$  would cause  $DIP_{pc}$  underestimation at warm and high accumulation sites. Analysis of correlation coefficients in LZ is less straightforward because its governing equations, Eq. (6), are less interpretable than the plain Arrhenius relationship of HL and Ar. Still, we highlight some correlated pairs of parameters. As could be expected from Eq. (6),  $lz_a$  and  $lz_b$  are negatively correlated ( $r = -0.73$ ). Also, the independent term of stage-1 densification  $lz_{11}$  is strongly correlated with the corresponding temperature-related parameter ( $lz_{13}$ ,  $r = 0.9$ ). The same is valid for stage-2 densification between  $lz_{21}$  and  $lz_{23}$  ( $r = 0.93$ ). The positive correlation between  $lz_{12}$  and  $lz_{22}$  ( $r = 0.6$ ) is discussed in the main text.

**Tables**

| Site        | Lat    | Lon     | Core depth [m] | Year | Mean $\dot{b}$ [m w.e.. yr <sup>-1</sup> ] | Mean T [°C] | $\rho_0$ [kg/m <sup>3</sup> ] | DIP15 [m] | Var DIP15 [m <sup>2</sup> ] | DIPpc [m] | Var DIPpc [m <sup>2</sup> ] |
|-------------|--------|---------|----------------|------|--------------------------------------------|-------------|-------------------------------|-----------|-----------------------------|-----------|-----------------------------|
| EGRIP       | 75.63  | -35.98  | 20.1           | 2017 | 0.113                                      | -29.0       | 285                           | 7.816     | 0.153                       | /         | /                           |
| Summit *    | 72.58  | -38.47  | 22.1           | 2017 | 0.205                                      | -28.4       | 330                           | 7.500     | 0.141                       | /         | /                           |
| id359       | 73.94  | -37.63  | 102.4          | 1993 | 0.124                                      | -28.8       | 240                           | 6.708     | 0.112                       | 11.456    | 1.312                       |
| id369       | 75.00  | -30.00  | 19.9           | 1997 | 0.135                                      | -27.6       | 335                           | 7.454     | 0.139                       | /         | /                           |
| id373       | 75.25  | -37.62  | 100.8          | 1993 | 0.106                                      | -29.5       | 275                           | 7.826     | 0.153                       | 12.372    | 1.531                       |
| id385       | 76.00  | -43.49  | 109.8          | 1995 | 0.124                                      | -29.3       | 315                           | 7.857     | 0.154                       | 13.186    | 1.739                       |
| id423 *     | 76.62  | -36.40  | 143.2          | 1993 | 0.093                                      | -29.1       | 310                           | 7.716     | 0.149                       | 10.666    | 1.138                       |
| id514       | 77.25  | -49.22  | 119.6          | 1995 | 0.163                                      | -28.3       | 300                           | 7.575     | 0.143                       | 13.217    | 1.747                       |
| id531 *     | 77.45  | -51.06  | 75.0           | 2009 | 0.198                                      | -27.4       | 320                           | 7.434     | 0.138                       | /         | /                           |
| id534       | 80.00  | -41.14  | 96.0           | 1994 | 0.105                                      | -28.4       | 335                           | 7.811     | 0.153                       | 11.345    | 1.287                       |
| Basin8      | 69.80  | -36.49  | 29.8           | 2003 | 0.350                                      | -25.6       | 300                           | 7.396     | 0.137                       | /         | /                           |
| D2          | 71.80  | -46.34  | 101.3          | 2003 | 0.421                                      | -23.4       | 370                           | 7.051     | 0.124                       | 14.097    | 1.987                       |
| D4          | 71.39  | -43.94  | 143.9          | 2003 | 0.390                                      | -24.6       | 300                           | 7.394     | 0.137                       | 12.770    | 1.631                       |
| HumboldtM * | 78.47  | -56.98  | 141.9          | 1995 | 0.384                                      | -24.8       | 280                           | 8.062     | 0.162                       | 10.947    | 1.198                       |
| NASAE1 *    | 74.98  | -29.97  | 19.9           | 1997 | 0.135                                      | -27.6       | 340                           | 7.394     | 0.137                       | /         | /                           |
| spencer6 *  | 72.57  | -37.62  | 82.3           | 1994 | 0.176                                      | -29.0       | 360                           | 4.889     | 0.060                       | /         | /                           |
| spencer16   | 71.75  | -40.75  | 15.0           | 1954 | 0.289                                      | -27.0       | 340                           | 7.216     | 0.130                       | /         | /                           |
| spencer17   | 77.95  | -39.18  | 60.0           | 1973 | 0.080                                      | -29.3       | 300                           | 5.002     | 0.063                       | 7.781     | 0.605                       |
| spencer66 * | 70.75  | -35.96  | 109.0          | 1987 | 0.247                                      | -27.3       | 300                           | 7.340     | 0.135                       | 14.852    | 2.206                       |
| spencer67   | 70.63  | -35.83  | 128.6          | 1988 | 0.262                                      | -27.0       | 325                           | 7.098     | 0.126                       | 14.114    | 1.992                       |
| spencer68 * | 70.65  | -35.48  | 105.6          | 1988 | 0.252                                      | -27.1       | 325                           | 7.172     | 0.129                       | 14.505    | 2.104                       |
| spencer69   | 70.67  | -35.80  | 24.8           | 1988 | 0.248                                      | -27.2       | 305                           | 7.184     | 0.129                       | /         | /                           |
| spencer70   | 70.63  | -35.63  | 100.1          | 1988 | 0.264                                      | -26.9       | 290                           | 6.772     | 0.115                       | 14.026    | 1.967                       |
| spencer71   | 71.76  | -35.87  | 77.8           | 1988 | 0.203                                      | -28.2       | 275                           | 7.043     | 0.124                       | 13.094    | 1.715                       |
| spencer72   | 71.48  | -35.88  | 25.7           | 1988 | 0.207                                      | -28.0       | 330                           | 7.223     | 0.130                       | /         | /                           |
| spencer73   | 71.15  | -35.85  | 70.8           | 1988 | 0.214                                      | -27.7       | 340                           | 7.230     | 0.131                       | /         | /                           |
| spencer74   | 70.85  | -35.85  | 26.2           | 1988 | 0.264                                      | -26.9       | 330                           | 7.087     | 0.126                       | /         | /                           |
| SouthPole   | -90.00 | 0.00    | 122.9          | 2001 | 0.055                                      | -47.8       | 325                           | 7.613     | 0.145                       | 22.312    | 4.978                       |
| Newall      | -77.58 | 162.50  | 111.1          | 1989 | 0.043                                      | -31.2       | 305                           | 7.160     | 0.128                       | 4.132     | 0.171                       |
| Berkner *   | -79.61 | -45.72  | 178.2          | 1995 | 0.124                                      | -28.3       | 345                           | 6.255     | 0.098                       | 9.658     | 0.933                       |
| DML *       | -71.41 | -9.92   | 78.2           | 2007 | 0.902                                      | -20.6       | 410                           | 6.037     | 0.091                       | 10.228    | 1.046                       |
| id9         | -76.77 | -101.74 | 111.6          | 2012 | 0.313                                      | -24.7       | 470                           | 6.194     | 0.096                       | 12.119    | 1.469                       |
| id10        | -76.95 | -121.22 | 62.0           | 2011 | 0.213                                      | -28.4       | 355                           | 6.947     | 0.121                       | /         | /                           |
| id11        | -77.06 | -89.14  | 114.5          | 2001 | 0.346                                      | -26.5       | 415                           | 5.879     | 0.086                       | 11.201    | 1.255                       |

|             |        |         |       |       |       |       |     |       |       |        |       |
|-------------|--------|---------|-------|-------|-------|-------|-----|-------|-------|--------|-------|
| id12        | -77.61 | -92.25  | 67.8  | 2001  | 0.301 | -27.8 | 350 | 6.019 | 0.091 | /      | /     |
| id13        | -77.68 | -124.00 | 59.3  | 2000  | 0.155 | -28.2 | 350 | 6.411 | 0.103 | /      | /     |
| id14        | -77.76 | 153.38  | 97.1  | 2006  | 0.048 | -44.6 | 360 | 6.833 | 0.117 | 17.516 | 3.068 |
| id15 *      | -77.84 | -102.91 | 70.7  | 2001  | 0.486 | -25.1 | 415 | 5.853 | 0.086 | /      | /     |
| id17        | -77.88 | 158.46  | 98.5  | 2006  | 0.058 | -41.1 | 350 | 6.419 | 0.103 | 11.687 | 1.366 |
| id18        | -77.96 | -95.96  | 57.4  | 2010  | 0.354 | -28.0 | 335 | 6.752 | 0.114 | /      | /     |
| id19        | -78.08 | -120.08 | 57.8  | 2000  | 0.171 | -27.7 | 315 | 6.253 | 0.098 | /      | /     |
| id20        | -78.12 | -95.65  | 70.5  | 2001  | 0.324 | -27.7 | 385 | 6.265 | 0.098 | /      | /     |
| id22 *      | -78.33 | -124.48 | 59.9  | 2000  | 0.152 | -27.7 | 285 | 6.509 | 0.106 | 8.989  | 0.808 |
| id24        | -78.43 | -115.92 | 59.8  | 2000  | 0.318 | -27.8 | 390 | 6.295 | 0.099 | /      | /     |
| id26        | -78.73 | -111.50 | 60.7  | 2000  | 0.329 | -27.8 | 350 | 6.427 | 0.103 | /      | /     |
| id28        | -79.04 | 149.68  | 100.1 | 2006  | 0.040 | -44.6 | 405 | 6.703 | 0.112 | 15.584 | 2.428 |
| id29 *      | -79.13 | -122.27 | 63.1  | 2000  | 0.127 | -27.8 | 300 | 6.507 | 0.106 | 9.926  | 0.985 |
| id30        | -79.16 | -104.97 | 72.7  | 2001  | 0.306 | -28.7 | 400 | 5.921 | 0.088 | /      | /     |
| id33        | -79.38 | -111.24 | 104.8 | 2000  | 0.239 | -28.2 | 370 | 6.159 | 0.095 | 12.943 | 1.675 |
| id35 *      | -79.48 | -112.09 | 160.0 | 2011  | 0.162 | -28.0 | 460 | 6.181 | 0.096 | 11.824 | 1.398 |
| id39        | -80.62 | -122.63 | 57.5  | 1999  | 0.094 | -25.9 | 370 | 6.253 | 0.098 | /      | /     |
| id43        | -81.20 | -126.17 | 48.3  | 1999  | 0.070 | -24.5 | 325 | 6.268 | 0.098 | 4.975  | 0.247 |
| id46        | -82.00 | -110.01 | 62.2  | 2002  | 0.180 | -27.8 | 340 | 6.161 | 0.095 | /      | /     |
| id48        | -83.50 | -104.99 | 61.7  | 2002  | 0.220 | -31.0 | 360 | 6.098 | 0.093 | /      | /     |
| id49 *      | -84.40 | 140.63  | 50.1  | 2007  | 0.023 | -45.4 | 340 | 6.886 | 0.119 | /      | /     |
| id50        | -85.00 | -105.00 | 44.9  | 2002  | 0.157 | -36.3 | 360 | 6.422 | 0.103 | /      | /     |
| id51        | -85.78 | 145.72  | 41.7  | 2007  | 0.033 | -46.1 | 310 | 6.767 | 0.114 | /      | /     |
| id52 *      | -86.50 | -107.99 | 71.6  | 2002  | 0.147 | -38.8 | 340 | 6.882 | 0.118 | /      | /     |
| id53        | -86.84 | 95.31   | 20.8  | 2003  | 0.042 | -53.3 | 355 | 6.535 | 0.107 | /      | /     |
| id54 *      | -88.00 | -107.98 | 54.1  | 2002  | 0.133 | -41.4 | 355 | 7.009 | 0.123 | /      | /     |
| id55        | -88.51 | 178.53  | 99.3  | 2007  | 0.081 | -48.2 | 320 | 6.880 | 0.118 | /      | /     |
| id56        | -89.93 | 144.39  | 139.5 | 2002  | 0.080 | -48.6 | 345 | 6.319 | 0.100 | 25.046 | 6.273 |
| spencer1    | -80.00 | -120.00 | 307.0 | 1968  | 0.120 | -27.2 | 350 | 6.987 | 0.122 | 10.314 | 1.064 |
| spencer4    | -66.72 | 113.18  | 200.9 | 1989  | 1.060 | -22.0 | 380 | 7.848 | 0.154 | 12.847 | 1.650 |
| spencer5    | -74.50 | 123.17  | 49.5  | 1980  | 0.037 | -51.8 | 345 | 8.262 | 0.171 | /      | /     |
| spencer7    | -85.25 | 166.50  | 79.9  | 19997 | 0.028 | -39.7 | 305 | 7.003 | 0.123 | 8.202  | 0.673 |
| spencer8    | -66.77 | 112.80  | 180.0 | 1997  | 0.488 | -22.7 | 385 | 7.385 | 0.136 | 10.640 | 1.132 |
| spencer22   | -73.60 | -12.43  | 25.5  | 1996  | 0.220 | -22.5 | 380 | 3.920 | 0.038 | /      | /     |
| spencer25   | -74.02 | -12.02  | 26.5  | 1996  | 0.171 | -30.7 | 390 | 5.412 | 0.073 | /      | /     |
| spencer29 * | -75.00 | 2.00    | 20.6  | 1996  | 0.072 | -42.9 | 320 | 7.602 | 0.144 | /      | /     |
| spencer33   | -70.68 | 44.32   | 123.5 | 1978  | 0.114 | -33.1 | 385 | 6.385 | 0.102 | 7.022  | 0.493 |

|             |        |         |       |      |       |       |     |       |       |        |       |
|-------------|--------|---------|-------|------|-------|-------|-----|-------|-------|--------|-------|
| spencer34 * | -70.68 | 44.32   | 109.0 | 1978 | 0.114 | -33.1 | 375 | 6.161 | 0.095 | 6.909  | 0.477 |
| spencer61   | -73.10 | 39.75   | 99.7  | 1978 | 0.069 | -42.3 | 360 | 7.005 | 0.123 | 16.245 | 2.639 |
| spencer62 * | -71.18 | 45.97   | 100.2 | 1997 | 0.091 | -38.2 | 395 | 7.049 | 0.124 | 16.344 | 2.671 |
| spencer76   | -90.00 | 0.00    | 122.1 | 1997 | 0.055 | -47.8 | 360 | 4.906 | 0.129 | /      | /     |
| spencer77   | -75.00 | 147.00  | 15.8  | 1961 | 0.042 | -46.1 | 385 | 7.184 | 0.130 | /      | /     |
| spencer78 * | -74.00 | 143.00  | 16.0  | 1961 | 0.043 | -45.5 | 375 | 7.205 | 0.128 | /      | /     |
| spencer79   | -73.00 | 142.00  | 15.7  | 1961 | 0.057 | -44.0 | 325 | 7.148 | 0.118 | /      | /     |
| spencer80   | -73.00 | 141.00  | 16.0  | 1961 | 0.057 | -44.0 | 355 | 6.876 | 0.120 | /      | /     |
| spencer81   | -72.00 | 140.00  | 16.9  | 1961 | 0.080 | -42.7 | 335 | 6.936 | 0.117 | /      | /     |
| spencer82 * | -71.00 | 139.00  | 15.6  | 1961 | 0.120 | -41.6 | 375 | 6.848 | 0.115 | /      | /     |
| spencer83   | -72.00 | 143.00  | 15.7  | 1961 | 0.087 | -41.3 | 405 | 6.796 | 0.118 | /      | /     |
| spencer84   | -72.00 | 146.00  | 16.2  | 1961 | 0.086 | -40.9 | 410 | 6.876 | 0.114 | /      | /     |
| spencer85   | -72.00 | 148.00  | 15.9  | 1961 | 0.096 | -40.2 | 360 | 6.745 | 0.121 | /      | /     |
| spencer86   | -72.00 | 151.00  | 15.8  | 1961 | 0.103 | -39.7 | 400 | 6.963 | 0.103 | /      | /     |
| spencer87   | -72.00 | 154.00  | 15.9  | 1961 | 0.130 | -38.0 | 355 | 6.430 | 0.124 | /      | /     |
| spencer88   | -72.00 | 156.00  | 15.7  | 1961 | 0.130 | -37.6 | 395 | 7.050 | 0.111 | /      | /     |
| spencer89   | -72.00 | 159.00  | 15.7  | 1961 | 0.115 | -35.7 | 370 | 6.665 | 0.139 | 10.046 | 1.009 |
| spencer90   | -83.47 | 138.80  | 340.5 | 1994 | 0.020 | -45.2 | 420 | 7.461 | 0.124 | 3.530  | 0.125 |
| spencer91   | -83.47 | -138.80 | 47.0  | 1987 | 0.058 | -27.1 | 295 | 7.037 | 0.193 | 20.368 | 4.148 |
| spencer92   | -78.47 | 106.80  | 179.3 | 1996 | 0.022 | -54.6 | 360 | 8.790 | 0.153 | /      | /     |

**Table S1.** The 91 firn core dataset used in this study. \* symbols indicate the core is part of the evaluation data. Lat and Lon designate latitude and longitude respectively. Year indicates the year of drilling of the core.  $\dot{b}$  is the accumulation rate. T is the temperature.  $\rho_0$  is the surface density boundary condition that was derived individually for each core by extrapolating density measurements until the surface. Var designates the site-specific variance used for the terms of  $\Sigma_{15}$  and  $\Sigma_{pc}$  (see Text S2 for their calculation).

| $cmp_{an}^{00-17}$<br>[m] | HL    | MAP <sub>HL</sub> | Ar    | MAP <sub>Ar</sub> | LZ    | MAP <sub>LZ</sub> |
|---------------------------|-------|-------------------|-------|-------------------|-------|-------------------|
| EGRIP                     | 0.626 | 0.648             | 0.735 | 0.656             | 0.675 | 0.695             |
| Summit                    | 0.464 | 0.461             | 0.442 | 0.442             | 0.481 | 0.475             |
| id359                     | 0.748 | 0.763             | 0.866 | 0.781             | 0.815 | 0.837             |
| id369                     | 0.609 | 0.587             | 0.597 | 0.574             | 0.623 | 0.617             |
| id373                     | 0.613 | 0.637             | 0.735 | 0.649             | 0.664 | 0.693             |
| id385                     | 0.319 | 0.333             | 0.407 | 0.356             | 0.373 | 0.393             |
| id423                     | 0.528 | 0.559             | 0.649 | 0.566             | 0.565 | 0.600             |
| id514                     | 0.358 | 0.367             | 0.409 | 0.378             | 0.409 | 0.423             |
| id531                     | 0.336 | 0.333             | 0.304 | 0.328             | 0.373 | 0.371             |
| id534                     | 0.216 | 0.214             | 0.189 | 0.205             | 0.229 | 0.237             |
| Basin8                    | 0.764 | 0.760             | 0.728 | 0.671             | 0.641 | 0.611             |
| D2                        | 0.244 | 0.255             | 0.222 | 0.164             | 0.158 | 0.133             |
| D4                        | 0.560 | 0.553             | 0.550 | 0.465             | 0.500 | 0.479             |
| HumboldtM                 | 0.630 | 0.616             | 0.606 | 0.534             | 0.562 | 0.545             |
| NASAE1                    | 0.591 | 0.568             | 0.578 | 0.555             | 0.605 | 0.596             |
| spencer6                  | 0.380 | 0.386             | 0.391 | 0.367             | 0.393 | 0.399             |
| spencer16                 | 0.499 | 0.489             | 0.500 | 0.428             | 0.462 | 0.448             |
| spencer17                 | 0.503 | 0.534             | 0.611 | 0.538             | 0.536 | 0.566             |
| spencer66                 | 0.963 | 0.944             | 0.955 | 0.912             | 0.926 | 0.889             |
| spencer67                 | 0.832 | 0.812             | 0.821 | 0.762             | 0.761 | 0.744             |
| spencer68                 | 0.895 | 0.875             | 0.895 | 0.831             | 0.838 | 0.811             |
| spencer69                 | 0.935 | 0.915             | 0.920 | 0.880             | 0.895 | 0.857             |
| spencer70                 | 1.078 | 1.056             | 1.060 | 1.017             | 1.025 | 0.982             |
| spencer71                 | 1.094 | 1.066             | 1.126 | 1.042             | 1.107 | 1.093             |
| spencer72                 | 0.809 | 0.806             | 0.852 | 0.780             | 0.812 | 0.799             |
| spencer73                 | 0.793 | 0.786             | 0.835 | 0.756             | 0.782 | 0.763             |
| spencer74                 | 0.856 | 0.842             | 0.861 | 0.785             | 0.786 | 0.771             |

**Table S2.** Total compaction anomaly over 2000-2017 ( $cmp_{an}^{00-17}$ ) at the 27 GrIS sites. See text S3 for calculation details.

## Figures

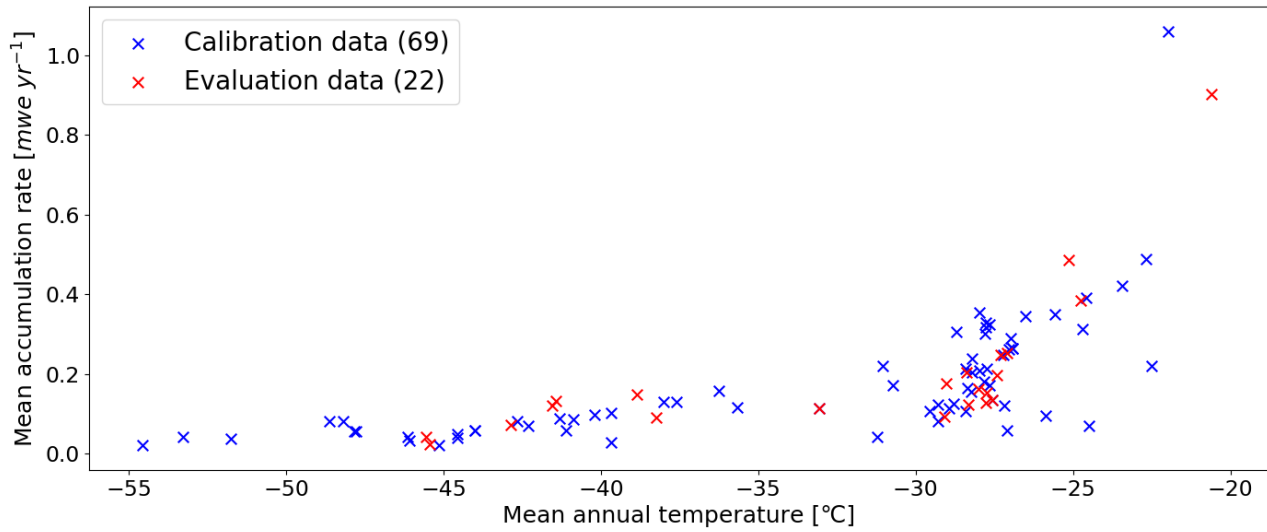

**Figure S1.** Climatic conditions at the 91 sites of the dataset

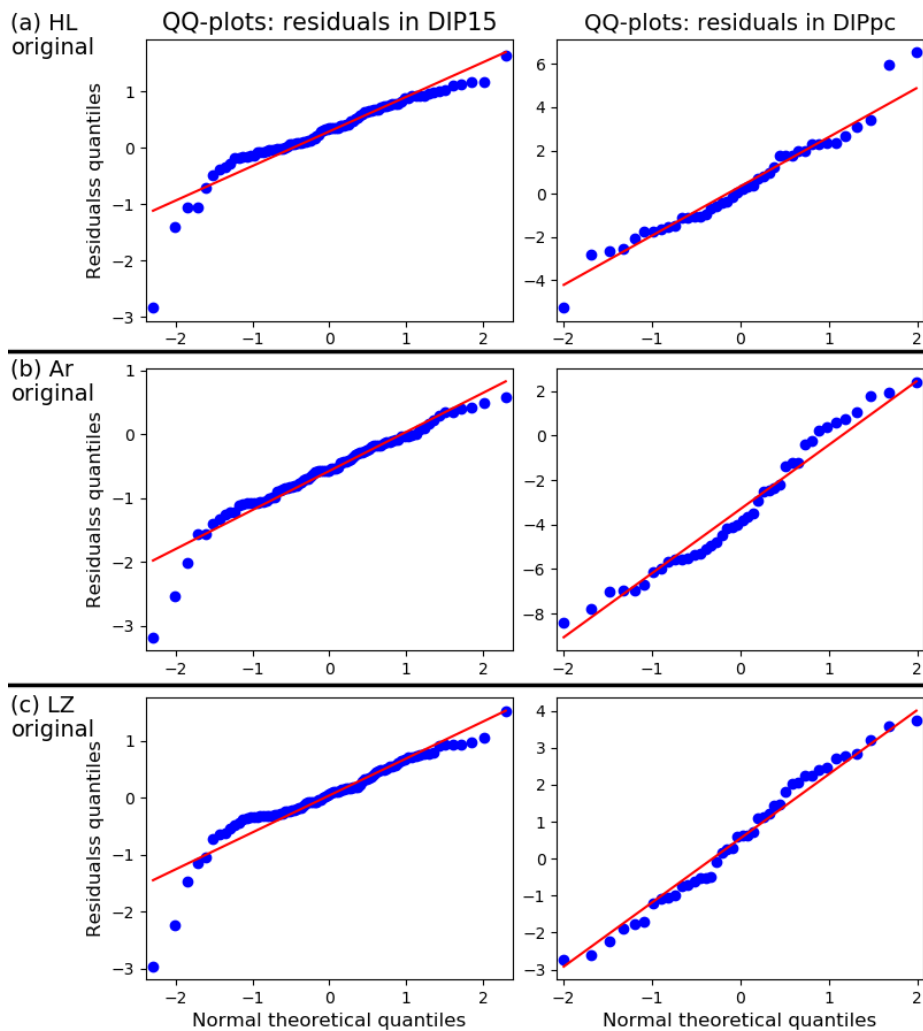

**Figure S2.** Quantiles-Quantiles plots for the errors of the original models computed on the entire dataset. The alignment of the points along the red line informs about the fit to a normal distribution.

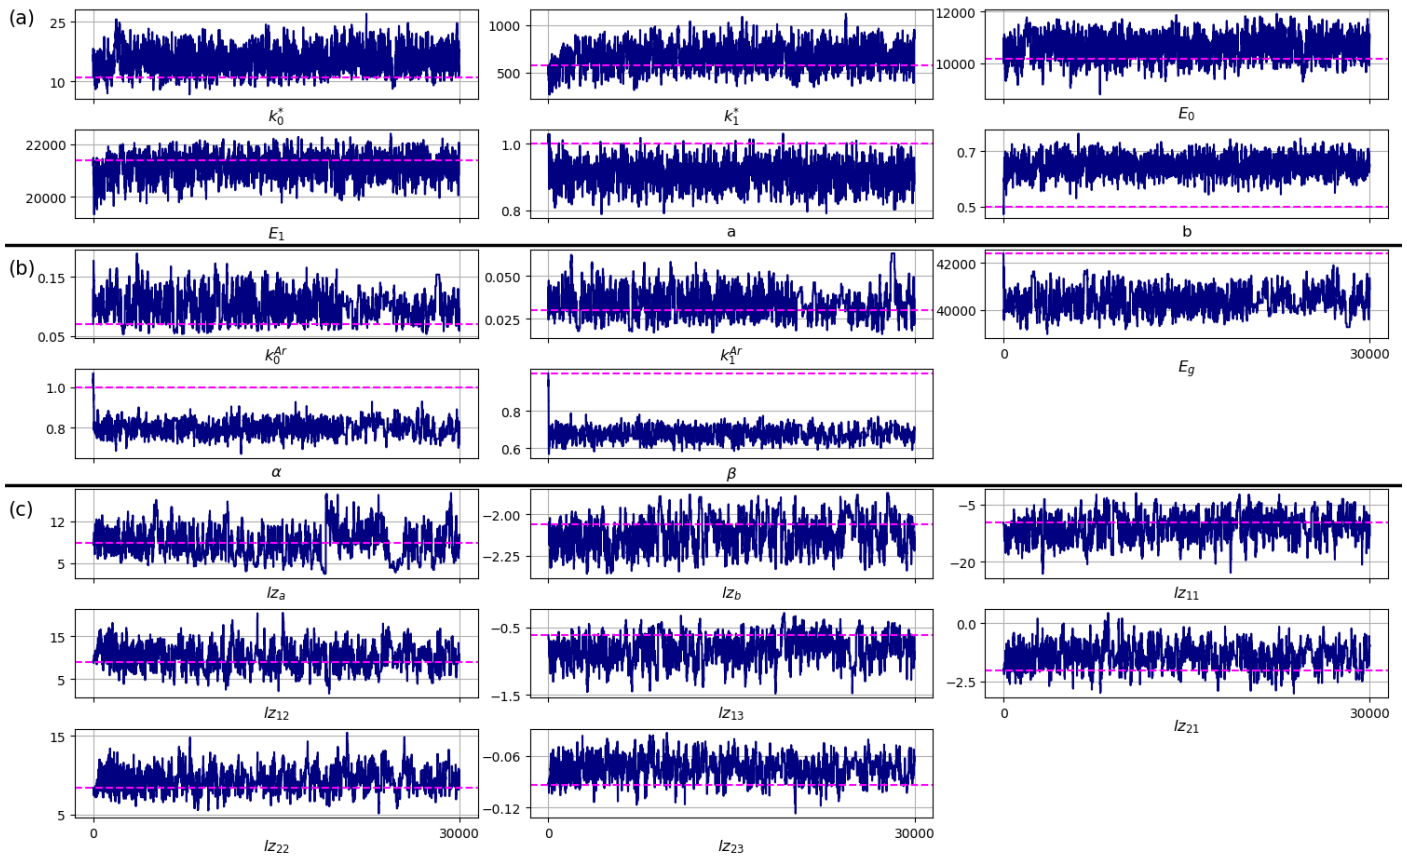

**Figure S3.** Sampling chains of each parameter for (a) HL, (b) Ar, (c) LZ. The x-axis displays the iteration number, the y-axis displays the parameter value. The dashed pink line shows the value of the original model, which is also the starting point of each chain.

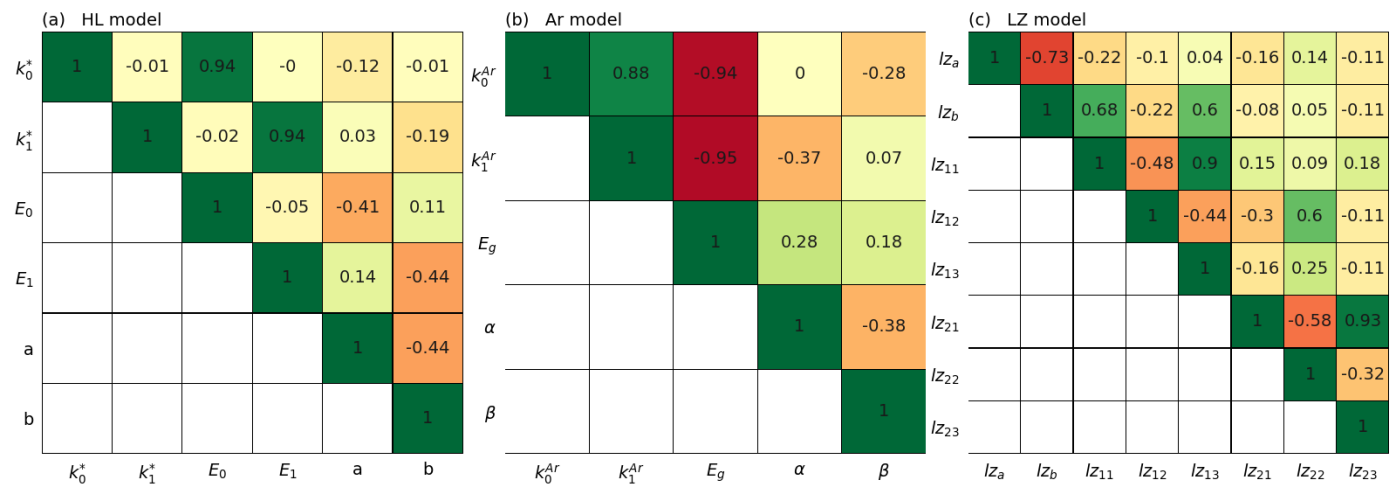

**Figure S4.** Posterior correlation matrices.
